# Supplementary material for: 1,4;5,8-naphthalene-tetracarboxylic diimide derivatives as model compounds for molecular layer epitaxy
Source: Royal Society of Chemistry journal article supplement (doi:10.1039/b601258b), 2006-01-01
Supplement: b601258b.pdf [file b601258b.pdf]

## 1,4;5,8-naphthalene-tetracarboxylic diimide Derivatives as Model Compounds for Molecular Layer Epitaxy

*Y. Ofir, A. Zelichenok, and Shlomo Yitzchaik\**

*Department of Inorganic and Analytical Chemistry & the Center for Nanoscience and  
Nanotechnology, The Hebrew University of Jerusalem, Jerusalem 91904, Israel*

### Supporting Information

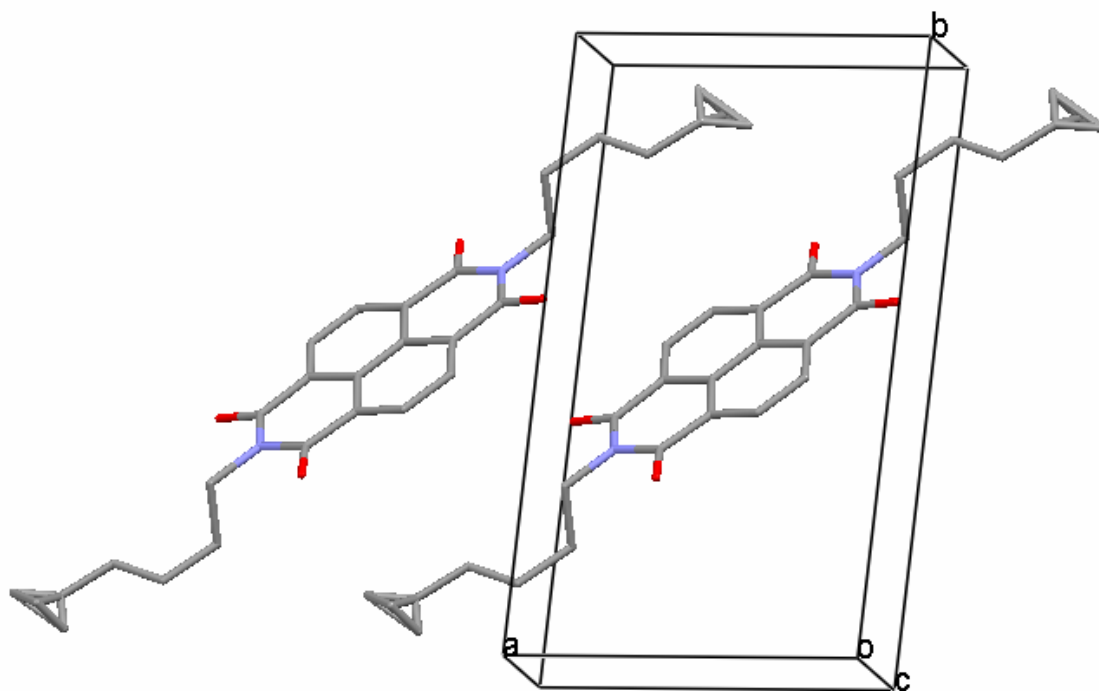

S1: Crystal packing of NTCDI-Dihexyl. A disorder in the last ethylene unit and an R-factor of 14% was received for this structure.
